# Supplementary material
Source: Springer Nature journal article supplement (https://www.springermedizin.de/resource/supplementary/12889_2014_7177_MOESM1_ESM.pdf/9496954)
Supplement: MOESM1 [file 9496954]

First lesson at school  
(January/February)

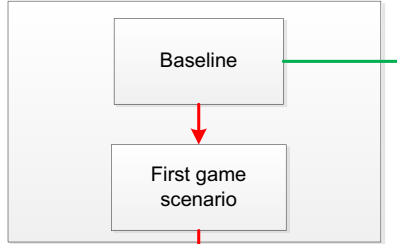

Second lesson at school  
(January/February)

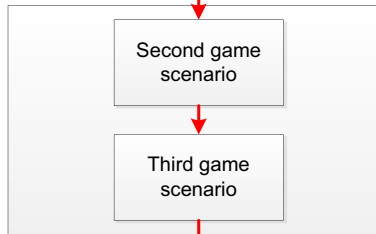

Between February and April at home

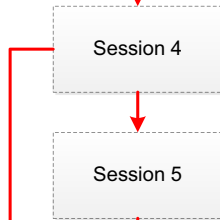

First follow-up at school (May/June)

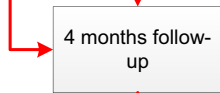

Second follow-up at home (September/October)

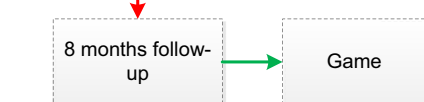

Red line: routing experimental condition, green line: routing control line, dashed boxes: intervention parts that have to be done at home.
